# Supplementary material
Source: PubMed Central journal article supplement (PMC1283783)
Supplement: plntphys_pp.105.069963_2.pdf [file plntphys_pp.105.069963_2.pdf]

| TF combination             | luc/Rluc $\pm$ SE |                  | ANOVA                    |
|----------------------------|-------------------|------------------|--------------------------|
|                            | Co-bomb           | Sum              |                          |
| AP2+A2 (Fig. 3)            | 27.58 $\pm$ 2.10  | 28.97 $\pm$ 2.69 | F=0.02, P=0.888          |
| <b>AP2+A9 (Fig. 3)</b>     | 41.84 $\pm$ 2.26  | 27.74 $\pm$ 1.74 | F=16.09, <b>P=0.0001</b> |
| <b>AP2+A9 (Fig. 5A)</b>    | 63.88 $\pm$ 2.72  | 44.01 $\pm$ 5.01 | F=15.41, <b>P=0.0001</b> |
| AP2+A9 (Fig. 5B)           | 42.90 $\pm$ 2.74  | 41.60 $\pm$ 1.95 | F=0.15, P=0.7043         |
| AP2+A9 (Fig. 5C)           | 7.31 $\pm$ 0.42   | 9.12 $\pm$ 1.07  | F=1.12, P=0.2933         |
| AP2+A9 (Fig. 5D)           | 3.89 $\pm$ 0.29   | 4.56 $\pm$ 0.53  | F=0.02, P=0.9038         |
| <b>AP2+A9 (Fig. 7, ns)</b> | 64.81 $\pm$ 5.65  | 43.54 $\pm$ 3.17 | F=9.13, <b>P=0.0029</b>  |
| <b>AP2+A2-9C (Fig. 7)</b>  | 67.51 $\pm$ 4.36  | 50.20 $\pm$ 3.41 | F=9.45, <b>P=0.0025</b>  |

**Supplemental Table 1.** Statistical analysis of the synergic interactions observed by transient expression in sunflower embryos. Data from the indicated TF combinations and Figures were analyzed following the logarithmic normalization and one-way ANOVA procedures previously described (Almoguera et al., 1998; Rojas et al., 2002). We include internal positive control data not shown (ns) in Figure 7. We show the SE and mean reporter activity (luc/Rluc) obtained after co-bombardment (Co-bomb) and from the sums of the activities separately induced by the corresponding TFs. Note that from each sum of two individual activity values, the basal level (activity without TF) was subtracted once. Sample sizes are similar to those indicated in the corresponding Figures, except for few points removed to improve normalization. The statistic (F) and probability (P) values are shown for each comparison between the Co-bomb and Sum mean activities. Statistically significant differences ( $P < 0.05$ ) are indicated with bold face.
